1 Association of C-reactive protein and Interleukin-6 single nucleotide polymorphisms  
2 with preterm labour: results of a pilot study

3  
4 Akira Sato<sup>1,2\*</sup>, Hiroshi Miura<sup>1</sup>, Yohei Onodera<sup>1</sup>, Hiromitsu Shirasawa<sup>1</sup>, Saeko  
5 Kameyama<sup>1</sup>, Akiko Fujishima<sup>1</sup>, Yuko Kikuti<sup>3</sup>, Mayumi Goto<sup>1</sup>, Toshiharu Sato<sup>1</sup>, Yukihiro  
6 Terada<sup>1</sup>

7  
8 <sup>1</sup>Department of obstetrics and gynaecology, Akita University Hospital, Hondo, Akita,  
9 Japan

10 <sup>2</sup>Department of obstetrics, Akita Red Cross Hospital, Aza Nashirozawa Saruta  
11 Kamikitade, Japan

12 <sup>3</sup>Central laboratory Division, Akita University Hospital, Hondo, Akita, Japan

13  
14 \*Corresponding author

15 Email: [satoa@doc.med.akita-u.ac.jp](mailto:satoa@doc.med.akita-u.ac.jp)

## 36 **Abstract**

37 Preterm labour (PTL) can be described as an inflammatory event. C-reactive protein  
38 (CRP) and Interleukin-6 (IL-6) are key members of the innate immune response that  
39 play major roles in inflammation. The main objective of this case-control study was to  
40 determine the association of specific CRP and IL-6 polymorphisms with PTL. The study  
41 was carried out in a total of 31 Japanese women with PTL and 28 control women with  
42 normal pregnancy. Four SNPs in the CRP gene (rs1800947, rs3091244, rs2794521, and  
43 rs3093059) and two SNPs in the IL-6 gene (rs2097677 and rs1800795) were genotyped  
44 using a polymerase chain reaction-restriction fragment length polymorphism  
45 (PCR-RFLP) assay. Biochemical parameters were assayed and cervical length  
46 measurements were performed with ultrasound sonography. There were no significant  
47 differences in inflammatory markers, including white blood cell count, CRP, neutrophil  
48 elastase in cervical mucous, and foetal fibronectin in vaginal discharge, between the  
49 PTL and control groups. The frequency of rs1800947 minor allele (G) was significantly  
50 higher in the PTL group than in the control group. This finding has not been previously  
51 reported. We suggest that mutations in rs1800947 may lead to PTL. Thus, the  
52 rs1800947 SNP may be useful as a genetic marker for PTL risk assessment in pregnant  
53 women.

## 54 **Introduction**

55 Preterm birth remains the major cause of neonatal morbidity and mortality. PTL may  
56 have several causes. One of the most convincing hypotheses is that, as in full-term  
57 labour[1], PTL may be the result of an inflammatory reaction. Before the onset of labour,  
58 a pro-inflammatory condition can be induced in reproductive tissues such as the  
59 myometrium, cervix, and decidua. This condition is characterized by pro-inflammatory  
60 cytokines such as IL-6 and -8, and the infiltration of monocytes and macrophages.  
61 Presumably, the inflammatory reaction may play a role in the transition of the  
62 myometrium from a quiescent to a contractile state. Infection as well as uterine  
63 hyperextension and bleeding in the contractile state could trigger the pathological  
64 contraction of the uterus, leading to PTL.

65 C-reactive protein (CRP), which plays an important role in innate immunity, is an acute  
66 reaction-related protein produced by the liver in response to IL-6. A genome-wide  
67 association study in Japanese subjects revealed the association between serum CRP  
68 levels and a single nucleotide polymorphism (SNP) in the promoter region of IL-6 [2].  
69 Meanwhile, CRP polymorphisms have been associated with various kinds of  
70 inflammatory diseases, such as bacterial infections [3,4], heart disorders [5–10], and  
71 malignant tumours [11–14]. Specific SNPs have previously been linked to preterm birth

72 and labour [15,16]. However, there are only a few reports on the association between  
73 IL-6 SNPs and PTL [17–19], and to the best of our knowledge, none on the association  
74 between CRP SNPs and PTL. Our attentions were paid to four SNPs in the CRP gene  
75 (rs1800947, rs3091244, rs2794521, and rs3093059) and two SNPs in the IL-6 gene  
76 (rs2097677 and rs1800795) in the reason why rs1800947, rs3091244, and rs2794521  
77 associated with CRP level in bacterial infection [4], rs2097677 and rs3093059  
78 associated with serum CRP level in a genome-wide association study in Japanese [2],  
79 and IL-6 rs1800795 associated with preterm birth [19] were reported previously.

80 Thus, the purpose of this study was to examine the association of specific CRP and  
81 IL-6 polymorphisms with PTL. Our findings suggest that mutations in rs1800947, a  
82 CRP SNP, may lead to PTL. Based on these findings, we propose that rs1800947 could  
83 be used as a genetic marker for PTL risk assessment in pregnant women.

## 84 **Materials and Methods**

### 85 **Ethics statement and study subjects**

86 The study protocol was approved by the institutional ethics committee of Akita  
87 University of Medicine (Approval number: 1431) and written informed consent was  
88 obtained from all participants.

89 This study was conducted in Akita prefecture at Akita University Hospital between

90 March 2017 and December 2019. This is a case-control study carried out in a total of 31  
91 Japanese women with PTL and 28 control women with normal pregnancy. The  
92 diagnosis of PTL was based on clinical criteria of regular uterine contractions  
93 accompanied by a change in cervical dilation, effacement, or both, or initial presentation  
94 with regular contractions and cervical dilation of at least 2 cm at 22–36 weeks of  
95 gestation [20]. Blood sampling, cervical and vaginal sampling, and transvaginal  
96 ultrasound examination were performed when PTL was diagnosed. In the control group,  
97 these samplings and measurements were performed at 26–28 weeks of gestation on  
98 periodical medical examination.

## 99 **Genotyping analysis**

100 Fresh blood was collected in EDTA tubes and subjected to density gradient  
101 centrifugation using Leuco Spin Medium (pluriSelect Life Science, Leipzig, Germany).  
102 After samples were centrifuged for 30 minutes at 1000g at room temperature, the layer  
103 corresponding to peripheral blood mononuclear cells (PBMCs) was collected and stored  
104 at –80 °C until use for SNP analysis. Genomic DNA was extracted from PBMCs using  
105 QIAamp DNA Mini Kit (QIAGEN, Germany). Four SNPs in the CRP gene (rs1800947,  
106 rs3091244, rs2794521, and rs3093059) and two SNPs in the IL-6 gene (rs2097677 and  
107 rs1800795) were genotyped in all samples using a polymerase chain reaction-restriction

108 fragment length polymorphism (PCR-RFLP) assay. The primer sequences are shown in  
 109 Table 1. PCR reactions were performed in a total volume of 50  $\mu$ l containing 50 ng  
 110 genomic DNA, 3  $\mu$ l of each primer (0.6  $\mu$ M), 200  $\mu$ M of each dNTP, 10 $\times$  PCR buffer  
 111 for KOD-Plus-Ver.2 (TOYOBO, Japan), 1.5 mM MgSO<sub>4</sub> and 1.0 U of KOD-Plus-  
 112 (TOYOBO, Japan). The amplification was carried out with an initial denaturation step  
 113 at 94 °C for 2 min, followed by 30 cycles of 30 seconds at 55 °C and 60 seconds at  
 114 68 °C. An ABI Prism 3130xl Genetic Analyzer (Applied Biosystems) was used to  
 115 sequence the PCR products. BEX Co., Ltd. cooperated in the genotyping of these SNPs  
 116 throughout the whole process.  
 117 Table1 Primer sequences for the detection of CRP and IL-6 gene polymorphisms.

|             | dbSNP ID         | Allele<br>(D/d)* | Primer  | Sequence                |
|-------------|------------------|------------------|---------|-------------------------|
| CRP<br>gene | <b>rs1800947</b> | <b>C/G</b>       | Forward | TGCCTCCACTTCTACACGGAAC  |
|             |                  |                  | Reverse | GGTTTGGTGAACACTTCGCCT   |
|             | <b>rs3091244</b> | <b>G/A,T</b>     | Forward | GACTCTACTACAAAGGATACGG  |
|             | <b>rs2794521</b> | <b>T/C</b>       | Reverse | CCTTTGGAAAAGATGTATTTCGG |
|             | <b>rs3093059</b> | <b>A/G</b>       |         |                         |
| IL-6        | <b>rs2097677</b> | <b>G/A</b>       | Forward | TTCCGCTAGTCAGTCCCATC    |

|      |           |     |         |                       |
|------|-----------|-----|---------|-----------------------|
| gene |           |     | Reverse | TTCGGCCACAAATTCAGTAGG |
|      | rs1800795 | G/C | Forward | AGGAAGAGTGGTTCTGCTTC  |
|      |           |     | Reverse | TGGAGGGGAGATAGAGCTTC  |

118 Primer sequences for the detection of CRP and IL-6 gene polymorphisms.

119 \* Major/minor allele, major and minor alleles are denoted by D and d, respectively.

## 120 **Biochemical parameters and cervical length measurements**

121 Serum CRP levels and white blood cell counts (WBC) were obtained in the main  
122 laboratory by a standard laboratory method. The samples of cervical fluid were obtained  
123 with cotton swab placed in the endocervical canal and were mixed and diluted with  
124 phosphate buffer, and the extracted buffer was filtrated. The concentration of neutrophil  
125 elastase (NE) in sample fluid was determined using a latex agglutination immunoassay  
126 kit (Sanwa Kagaku Co., Nagoya, Japan)[21]. Samples of foetal fibronectin (FF) were  
127 obtained by taking a cotton swab from posterior vaginal fornix. The concentration of FF  
128 in the sample fluid was determined using an enzyme-linked immunosorbent assay kit  
129 (Sekisui Medical Co., Tokyo, Japan)[22]. The cut-off points of NE and FF were 1.60  
130  $\mu\text{g/mL}$  and 50 ng/ml, respectively. SRL Co., Ltd. cooperated on NE and FF  
131 measurements. All cervical length measurements were carried out according to the  
132 guidelines of the Foetal Medicine Foundation [23]. Immediately after delivery, 1–2 ml

133 blood from an umbilical cord artery was taken in a heparin syringe and examined with  
134 the laboratory blood gas analyser (ABL80FLEX, RADIOMETER Co., Japan).

## 135 **Statistical analysis**

136 All data were analysed using the statistical software package JMP 12.2.0 (SAS  
137 Institute Inc, Cary, NC, USA). Continuous variables are presented as means  $\pm$  standard  
138 deviations or median (interquartile range) and categorical variables are presented as  
139 fraction. Univariate analysis used student's t-test, Wilcoxon-rank sum test (if variable  
140 was not normally distributed), Chi squared test, or Fisher's exact test as appropriate.  
141 Normality was assessed using the Shapiro-Wilk test. Odds ratios with 95% confidence  
142 intervals for the genotypes were calculated using Chi squared test, or Fisher's exact test.  
143 All tests are two sided and p values less than 0.05 were considered statistically  
144 significant. Genotype frequencies of all SNPs were tested for Hardy-Weinberg  
145 equilibrium (HWE) by chi square test.

## 146 **Results**

147 Demographic and clinical parameters of the PTL and control groups are shown in  
148 Table 2. A significant difference in cervical length was observed between the PTL and  
149 control groups ( $p < 0.001$ ). In contrast, no significant differences in CRP levels were  
150 observed between the two groups. The frequencies of positive NE and FF were not



151 significantly different between the two groups.

152 Table 2 Comparison of demographic and clinical parameters between the PTL and

153 Control groups.

|                                  | PTL<br>(N=31)   | Control<br>(N=28) | p-values |
|----------------------------------|-----------------|-------------------|----------|
| Maternal age (years)             | 33.0±4.92       | 33.9±5.28         | 0.486    |
| Primiparous/Multiparous          | 15/16           | 11/17             | 0.601    |
| Primigravid/Multigravid          | 22/9            | 15/13             | 0.189    |
| History of premature<br>delivery | 5/26            | 4/24              | 1.000    |
| GA at examination<br>*(weeks)    | 27(26-28)       | 27(26-27)         | 0.180    |
| WBC (/μL)                        | 7958±1447       | 8689±1914         | 0.101    |
| CRP (mg/dL)                      | 0.15(0.08-0.33) | 0.13(0.06-0.22)   | 0.347    |
| Cervical length (mm)             | 27.5±9.81       | 49.2±11.4         | < 0.001  |
| PMNE<br>(negative/positive)      | 15/16           | 14/14             | 1.000    |
| Fibronectin                      | 29/2            | 28/0              | 0.492    |

|                     |  |  |  |
|---------------------|--|--|--|
| (negative/positive) |  |  |  |
|---------------------|--|--|--|

154 \*GA at examination: gestational age at blood and vaginal sampling and ultrasound  
 155 measurement. Maternal age, WBC, and Cervical length are presented as means±  
 156 standard deviation. GA at examination and CRP are presented as median (interquartile  
 157 range). All categorical variables are presented as fraction.

158

159 Perinatal and neonatal parameters are presented in Table 3. Gestational age at delivery  
 160 was significantly lower in the PTL group ( $p < 0.05$ ). Mode of delivery, neonatal body  
 161 weight, sex, Apgar Score, and pH of the umbilical artery were not significantly different  
 162 between the two groups.

163 Table 3 Comparison of perinatal and neonatal data

|                                        | PTL<br>(N=31)   | Control<br>(N=28) | p-values |
|----------------------------------------|-----------------|-------------------|----------|
| GA at delivery<br>(weeks)              | 37(36-37)       | 39(38-40)         | < 0.001  |
| Mode of delivery<br>(vaginal/cesarean) | 21/10           | 18/10             | 0.790    |
| Neonatal Weight                        | 2792(2542-3022) | 2895(2752-3086)   | 0.054    |
| Male/Female                            | 20/11           | 11/17             | 0.069    |
| Apgar Score                            |                 |                   |          |
| 1 minutes                              |                 |                   |          |
| 0-3                                    | 2               | 0                 | 0.742    |
| 4-6                                    | 1               | 1                 |          |
| 7-10                                   | 28              | 27                |          |
| 5 minutes                              |                 |                   |          |
| 0-3                                    | 0               | 0                 |          |

|                        |            |            |       |
|------------------------|------------|------------|-------|
| 4–6                    | 1          | 0          | 1.000 |
| 7–10                   | 30         | 28         |       |
| pH of Umbilical Artery | 7.31±0.067 | 7.32±0.057 | 0.676 |

164 \*GA at examination: gestational age at delivery.

165 GA at delivery and pH of Umbilical artery are presented as means± standard deviation.

166 Neonatal weight is presented as median (interquartile range). All categorical variables  
167 are presented as fraction.

168

169 Genotype and allele distribution of candidate SNPs are described in Table 4.

170 Rs1800947 in the PTL group (MAF0.19, p<0.001) and rs3091244 in both the PTL

171 (MAF0.22, p<0.001) and control (MAF0.28, p<0.001) groups were deviated from HWE,

172 while the other SNPs were in HWE in both groups. All participants of both groups had

173 GG genotype of IL-6 rs1800795. A significant difference was observed in the genotype

174 distribution of rs1800947 between the PTL and control groups. Specifically, the

175 frequency of the minor G allele was significantly higher in the PTL group (p<0.05).

176 Table 4 Genotypes and alleles distribution of CRP rs1800947, rs3091244, rs2794521,

177 and 3093059, and IL-6 rs2097677, and rs1800795 polymorphisms in the PTL and

178 Control groups.

| SNPs (D/d) * | PTL(N=31) | Control(N=28) | OR(95%CI) | p-values |
|--------------|-----------|---------------|-----------|----------|
|--------------|-----------|---------------|-----------|----------|

|           |          |          |                    |       |
|-----------|----------|----------|--------------------|-------|
| rs1800947 | HWE      | HWE      |                    |       |
| (C/G)     | p<0.001  | p=1.000  |                    |       |
|           | MAF 0.19 | MAF 0    |                    |       |
| CC        | 27       | 28       | 1.000(Ref)         |       |
| CG        | 2        | 0        | -                  | 0.157 |
| GG        | 2        | 0        | -                  | 0.157 |
| CG+GG     | 4        | 0        | -                  | 0.049 |
| Allele    |          |          |                    |       |
| C         | 56       | 56       | 1.000(Ref)         |       |
| G         | 6        | 0        | -                  | 0.017 |
| rs3091244 | HWE      | HWE      |                    |       |
| (G/T, A)  | p<0.001  | p<0.001  |                    |       |
|           | MAF 0.22 | MAF 0.28 |                    |       |
| GG        | 17       | 15       | 1.000(Ref)         |       |
| GT        | 9        | 8        | 0.993(0.305-3.226) | 0.990 |
| GA        | 5        | 2        | 0.453(0.076-2.690) | 0.376 |
| TT        | 0        | 2        | -                  | 0.145 |
| AT        | 0        | 1        | -                  | 0.295 |

|             |          |          |                    |       |
|-------------|----------|----------|--------------------|-------|
| GT+GA+TT+AT | 14       | 13       | 0.950(0.341-2.650) | 0.922 |
| Allele      |          |          |                    |       |
| G           | 48       | 40       | 1.000(Ref)         |       |
| T           | 9        | 13       | 0.577(0.227-1.674) | 0.252 |
| A           | 5        | 3        | 0.720(0.162-3.200) | 0.665 |
| rs2794521   | HWE      | HWE      |                    |       |
| (T/C)       | p=0.230  | p=0.604  |                    |       |
|             | MAF 0.17 | MAF 0.08 |                    |       |
| TT          | 20       | 23       | 1.000(Ref)         |       |
| TC          | 11       | 5        | 0.395(0.117-1.332) | 0.128 |
| Allele      |          |          |                    |       |
| T           | 51       | 51       | 1.000(Ref)         |       |
| C           | 11       | 5        | 0.455(0.147-1.402) | 0.163 |
| rs3093059   | HWE      | HWE      |                    |       |
| (A/G)       | p=0.344  | p=0.603  |                    |       |
|             | MAF 0.14 | MAF 0.23 |                    |       |
| AA          | 22       | 17       | 1.000(Ref)         |       |
| AG          | 9        | 9        | 0.773(0.251-2.368) | 0.652 |

|                    |                            |                            |                    |       |
|--------------------|----------------------------|----------------------------|--------------------|-------|
| GG                 | 0                          | 2                          | -                  | 0.119 |
| AG+GG              | 9                          | 11                         | 0.632(0.214-1.871) | 0.406 |
| Allele             |                            |                            |                    |       |
| A                  | 53                         | 43                         | 1.000(Ref)         |       |
| G                  | 9                          | 13                         | 0.562(0.219-1.438) | 0.226 |
| rs2097677<br>(G/A) | HWE<br>p=0.076<br>MAF 0.24 | HWE<br>p=0.890<br>MAF 0.17 |                    |       |
| GG                 | 16                         | 19                         | 1.000(Ref)         |       |
| GA                 | 15                         | 8                          | 0.449(0.152-1.330) | 0.145 |
| AA                 | 0                          | 1                          | -                  | 0.364 |
| Allele             |                            |                            |                    |       |
| G                  | 47                         | 46                         | 1.000(Ref)         |       |
| A                  | 15                         | 10                         | 0.681(0.278-1.671) | 0.400 |

179 \*Major/minor allele, major and minor alleles are denoted by D and d, respectively.

180 OR: Odds ratio. CI : Confidence interval. HWE: Hardy-Weinberg equilibrium. MAF:

181 Minor allele frequency.

182 All participants of both groups had GG genotype of IL-6 rs1800795.

183

## 184 **Discussion**

185 In this study, we did not find significant differences in WBC and serum CRP levels,  
186 which are common markers of inflammation and bacterial infection, between the PTL  
187 and control groups. These results are consistent with the fact that pregnant women  
188 experiencing PTL often show no signs of clinical inflammation or infection. Moreover,  
189 no significant differences in NE and FF, which are local inflammatory markers in the  
190 uterus, cervix, and vagina, were found between the two groups. Previous reports have  
191 already indicated that their efficacy as PTL markers is controversial [24-27]. Regarding  
192 perinatal prognosis, the gestational age at delivery was significantly lower in the PTL  
193 group than in the control group.

194 The examination of four candidate SNPs in the CRP gene and two candidate SNPs in  
195 the IL-6 gene that are associated with CRP production indicated that the frequency of  
196 rs1800947 minor G allele in the CRP gene was significantly higher in the PTL group.  
197 The human CRP gene is located on chromosome 1q21–23, spanning approximately 1.9  
198 kb and containing two exons. Rs1800947 is a synonymous coding polymorphism  
199 located on exon 2 of the CRP gene, which was reported for the first time by Cao et al.  
200 [28]. Subsequently, various diseases have been associated with rs1800947, such as

201 coronary artery disease [5,6], myocardial infarction [7–10], cerebrovascular  
202 ischemia-related disease [29–31], prostate cancer [12,13], colorectal cancer [14],  
203 diabetes [32], and depression [33]. The association of this SNP with low CRP levels was  
204 also described in myocardial infarction [7], coronary artery bypass surgery [6], coronary  
205 artery disease [5], cerebrovascular ischemia-related disease [31], diabetes [32], prostate  
206 cancer [12], and oesophageal cancer [34]. In this study, we could not statistically  
207 examine CRP levels according to the genotype of each SNP because of the limited  
208 number of study subjects.

209 CRP was discovered as a protein bound to phosphocholine, which is a kind of  
210 phospholipid present in the pneumococcal surface. CRP is a representative acute  
211 reaction-related protein that increases in the blood during inflammation, infection, and  
212 tissue injury. When CRP binds to various ligands such as phosphocholine or  
213 polycationic molecules, the classical complement pathway can be activated.  
214 Furthermore, CRP reinforces the production of inflammatory cytokines and tissue  
215 factors (TFs), and the expression of plasminogen activator-1 (PAI-1) in macrophages,  
216 smooth-muscle cells, and vascular endothelial cells.

217 According to previous reports, mutations in CRP rs1800947 could be involved in the  
218 occurrence and development of diseases because CRP plays a key role in innate



219 immunity. Multiple factors such as environmental agents could induce these diseases in  
220 the presence of a particular SNP mutation. Given our results, we hypothesize that the  
221 SNP mutation in the CRP gene could reinforce the production of chemical mediators  
222 such as IL-6 by macrophages, which may lead to a pro-inflammatory state in the  
223 myometrium and decidua that induces labour.

224 IL-6 is produced by monocytes, macrophages, and endothelial cells. The relationship  
225 between IL-6 and PTL has been extensively described [35-47]. IL-6 increases the  
226 expression of myometrial oxytocin receptor and promotes oxytocin secretion, increasing  
227 the reactivity of oxytocin [1, 48]. Thus, IL-6 may initiate the pathogenesis of PTL. In  
228 this study, we did not observe significant differences in the frequencies of alleles in the  
229 IL-6 rs2097677 and rs1800795 SNPs. Adam et al. reported no significant impact of  
230 rs1800795 on preterm labour with rupture [17]. Felix et al. reported no significant  
231 association of rs1800795 with preterm birth in a study of obstetrical complications in  
232 1,626 pregnant women [18]. Conversely, Digna et al. described rs1800795 as one of the  
233 significantly relevant gene sites in association with preterm birth [19]. In this study, the  
234 results on rs2097677 and rs1800795 were consistent with the former two reports.

235 One limitation of this study was the deviation of rs1800947 from HWE, which  
236 indicated the possibility of structured subjects in this study. Other limitations include a

237 small sample size, the lack of serum IL-6 measurements, and the absence of  
238 pathological examination of the placenta. A prospective observational study should be  
239 conducted and will be necessary to increase the number of subjects in the future.

## 240 **Conclusion**

241 An association between the rs1800947 minor G allele and PTL was observed in this  
242 study. Given the association of rs1800947 with other diseases, we suggest that PTL may  
243 occur as a result of rs1800947 gene mutation. Thus, rs1800947 could be used as a  
244 genetic marker for PTL risk assessment in pregnant women.

## 245 **Acknowledgments**

246 The authors thank the participants and staff for their participation in the study. We  
247 would like to thank Editage ([www.editage.com](http://www.editage.com)) for English language editing.

## 248 **References**

- 249 1. Sivarajasingam SP, Imami N, Johnson MR. Myometrial cytokines and their role in  
250 the onset of labour. *J Endocrinol*;Volume 231: R101–R119.  
251 doi:[10.1530/JOE-16-0157](https://doi.org/10.1530/JOE-16-0157).
- 252 2. Okada Y, Takahashi A, Ohmiya H, Kumasaka N, Kamatani Y, Hosono N, et al.  
253 Genome-wide association study for C-reactive protein levels identified pleiotropic  
254 associations in the IL6 locus. *Hum Mol Genet*. 2011;20:6: 1224-1231.

- 255        doi:[10.1093/hmg/ddq551](https://doi.org/10.1093/hmg/ddq551), PubMed: [21196492](https://pubmed.ncbi.nlm.nih.gov/21196492/).
- 256        3. Nasr A, Allam G, Al-Zahrani A, Alsulaimani A. Neonatal infections in Saudi Arabia:  
257        association with C-reactive protein, CRP -286(C>T>A) gene polymorphism and IgG  
258        antibodies. BMC Immunol. 2013;14: 38. Available:  
259        <http://www.biomedcentral.com/1471-2172/14/38>. doi:[10.1186/1471-2172-14-38](https://doi.org/10.1186/1471-2172-14-38),  
260        PubMed: [23941472](https://pubmed.ncbi.nlm.nih.gov/23941472/).
- 261        4. Mölkänen T, Rostila A, Ruotsalainen E, Alanne M, Perola M, Jarvinen A. Genetic  
262        polymorphism of the C-reactive protein (CRP) gene and a deep infection focus  
263        determine maximal serum CRP level in Staphylococcus aureus bacteremia. Eur J  
264        Clin Microbiol Infect Dis. 2010;29: 1131-1137. doi:[10.1007/s10096-010-0978-z](https://doi.org/10.1007/s10096-010-0978-z),  
265        PubMed: [20552244](https://pubmed.ncbi.nlm.nih.gov/20552244/).
- 266        5. Grammer TB, März W, Renner W, Böhm BO, Hoffmann MM. C-reactive protein  
267        genotypes associated with circulating C-reactive protein but not with angiographic  
268        coronary artery disease: the LURIC study. Eur Heart J. 2009;30: 170–182.  
269        doi:[10.1093/eurheartj/ehn191](https://doi.org/10.1093/eurheartj/ehn191), PubMed: [18499652](https://pubmed.ncbi.nlm.nih.gov/18499652/).
- 270        6. Perry TE, Muehlschlegel JD, Liu KY, Fox AA, Collard CD, Body SC, et al.  
271        C-Reactive protein gene variants are associated with postoperative C-reactive

- 272 protein levels after coronary artery bypass surgery. BMC Med Genet. 2009;10: 38.  
273 doi:[10.1186/1471-2350-10-38](https://doi.org/10.1186/1471-2350-10-38). PubMed: [19426506](https://pubmed.ncbi.nlm.nih.gov/19426506/).
- 274 7. Kolz M, Koenig W, Müller M, Andreani M, Greven S, Illig T, et al. DNA variants,  
275 plasma levels and variability of C-reactive protein in myocardial infarction  
276 survivors: results from the AIRGENE study. Eur Heart J. 2008;29: 1250-1258.  
277 doi:[10.1093/eurheartj/ehm442](https://doi.org/10.1093/eurheartj/ehm442), PubMed: [17956875](https://pubmed.ncbi.nlm.nih.gov/17956875/).
- 278 8. Schulz S, Lüdi H, Lierath M, Schlitt A, Werdan K, Hofmann B, et al. C-reactive  
279 protein levels and genetic variants of CRP as prognostic markers for combined  
280 cardiovascular endpoint (cardiovascular death, death from stroke, myocardial  
281 infarction, and stroke/TIA). Cytokine. 2016;Volume 88; Dec: 71-76.  
282 doi:[10.1016/j.cyto.2016.08.021](https://doi.org/10.1016/j.cyto.2016.08.021), PubMed: [27580453](https://pubmed.ncbi.nlm.nih.gov/27580453/).
- 283 9. Yazmín HD, Carlos ATZ, Isela JR, Manuel ABG, Manuel ETH, María LLN, et al.  
284 The role of gene variants of the inflammatory markers CRP and TNF- $\alpha$  in  
285 cardiovascular heart disease: systematic review and meta-analysis. Int J Clin Exp.  
286 2015;15:8 (8): 11958-11984.
- 287 10. Hindorff LA, Rice KM, Lange LA, Diehr P, Halder I, Walston J, et al. Common  
288 variants in the CRP gene in relation to longevity and cause-specific mortality in

- 289 older adults: the Cardiovascular Health Study. *Atherosclerosis*. 2008;197(2):  
290 922-930. doi:[10.1016/j.atherosclerosis.2007.08.012](https://doi.org/10.1016/j.atherosclerosis.2007.08.012), PubMed: [17888441](https://pubmed.ncbi.nlm.nih.gov/17888441/).
- 291 11. Kito M, Motoyama S, Fujita K, Miura M, Nanjo H, Sato N, et al. CRP1846C>T  
292 genetic polymorphism is associated with lymph node metastasis and/or severe  
293 lymphatic invasion in endometrial cancer. *Tohoku J Exp Med*. 2015;237: 25-30.  
294 doi:[10.1620/tjem.237.25](https://doi.org/10.1620/tjem.237.25), PubMed: [26310275](https://pubmed.ncbi.nlm.nih.gov/26310275/).
- 295 12. Markt SC, Rider JR, Penney KL, Schumacher FR, Epstein MM, Fall K, et al.  
296 Genetic variation across C-reactive protein and risk of prostate cancer. *Prostate*.  
297 2014;74(10): 1034-1042. doi:[10.1002/pros.22820](https://doi.org/10.1002/pros.22820), PubMed: [24844401](https://pubmed.ncbi.nlm.nih.gov/24844401/).
- 298 13. Eklund CM, Tammela TLJ, Schleutker J, Hurme M. C-reactive protein haplotype is  
299 associated with high PSA as a marker of metastatic prostate cancer but not with  
300 overall cancer risk. *Br J Cancer*. 2009;100(12): 1846-1851.  
301 doi:[10.1038/sj.bjc.6605081](https://doi.org/10.1038/sj.bjc.6605081), PubMed: [19436291](https://pubmed.ncbi.nlm.nih.gov/19436291/).
- 302 14. Chen XL, Liao YQ, Liu JR. Genotype CC of rs1800947 in the C-reactive protein  
303 gene may increase susceptibility to colorectal cancer: a meta-analysis. *Asian Pac J*  
304 *Cancer Prev*. 2014;15(6): 2663-2667. doi:[10.7314/apjcp.2014.15.6.2663](https://doi.org/10.7314/apjcp.2014.15.6.2663), PubMed:  
305 [24761881](https://pubmed.ncbi.nlm.nih.gov/24761881/).

- 306 15. Ramos BR, Mendes ND, Tanikawa AA, Amador MA, dos Santos NP, dos Santos SE,  
307 et al. Ancestry informative markers and selected single nucleotide polymorphisms in  
308 immunoregulatory genes on preterm labor and preterm premature rupture of  
309 membranes: a case control study. BMC Preg Childbirth. 2016;16: 30.  
310 doi:[10.1186/s12884-016-0823-1](https://doi.org/10.1186/s12884-016-0823-1), PubMed: [26846412](https://pubmed.ncbi.nlm.nih.gov/26846412/).
- 311 16. Sheikh IA, Ahmad E, Jamal MS, Rehan M, Assidi M, Tayubi IA, et al. Spontaneous  
312 preterm birth and single nucleotide gene polymorphisms: a recent update. BMC  
313 Genomics. 2016;17(suppl 9): 759. doi:[10.1186/s12864-016-3089-0](https://doi.org/10.1186/s12864-016-3089-0), PubMed:  
314 [27766960](https://pubmed.ncbi.nlm.nih.gov/27766960/).
- 315 17. Bitner A, Kalinka J. IL- $\beta$ , IL-6 promoter, TNF- $\alpha$  promoter and IL-1RA gene  
316 polymorphisms and the risk of preterm delivery due to preterm premature rupture of  
317 membranes in a population of Polish women. Arch Med Sci. 2010;6, 4: 552-557.  
318 doi:[10.5114/aoms.2010.14467](https://doi.org/10.5114/aoms.2010.14467), PubMed: [22371799](https://pubmed.ncbi.nlm.nih.gov/22371799/).
- 319 18. Stonek F, Metzenbauer M, Hafner E, Philipp K, Tempfer C. Interleukin 6-174 G/C  
320 promoter polymorphism and pregnancy complications: results of a prospective  
321 cohort study in 1626 pregnant women. Am J Reprod Immunol. 2008;Volume 59:  
322 347–351. doi:[10.1111/j.1600-0897.2007.00577.x](https://doi.org/10.1111/j.1600-0897.2007.00577.x). PubMed: [18336388](https://pubmed.ncbi.nlm.nih.gov/18336388/).
- 323 19. Velez DR, Fortunato SJ, Williams SM, Menon R. Interleukin-6 (IL-6) and

- 324 receptor(IL6-R) gene haplotypes associate with amniotic fluid protein  
325 concentrations in preterm birth. Hum Mol Genet. 2008;17, 11: 1619-1630.  
326 doi:[10.1093/hmg/ddn049](https://doi.org/10.1093/hmg/ddn049), PubMed: [18276608](https://pubmed.ncbi.nlm.nih.gov/18276608/).
- 327 20. American College of Obstetricians and Gynecologists' Committee on Practice  
328 Bulletins—Obstetrics: Practice Bulletin No. 171. Practice Bulletin No. 171:  
329 Management of Preterm Labor. Obstet Gynecol. 2016;128(4): e155-e164.  
330 doi:[10.1097/AOG.0000000000001711](https://doi.org/10.1097/AOG.0000000000001711), PubMed: [27661654](https://pubmed.ncbi.nlm.nih.gov/27661654/).
- 331 21. Masuda Y, Maruyama H, Kuraya K. Relationship between granulocyte elastase  
332 levels and perinatal infections. Gynecol Obstet Invest. 1995;39:162–6.
- 333 22. Lockwood CJ, Senyei AE, Dische MR, Casal D, Shah KD, Thung SN, et al. Fetal  
334 fibronectin in cervical and vaginal secretions as a predictor of preterm delivery. N Engl J  
335 Med. 1991;325(10):669-674.
- 336 23. Available:  
337 [http://www.fetalmedicine.com/fmf/training-certification/certificates-of-competence/  
338 cervical-assessment/](http://www.fetalmedicine.com/fmf/training-certification/certificates-of-competence/cervical-assessment/).
- 339 24. Nakai A, Taniuchi Y, Miyake H, Nakai M, Yokota A, Takeshita T. Increased level of  
340 granulocyte elastase in cervical secretion is an independent predictive factor for  
341 preterm delivery. Gynecol Obstet Invest Actions. 2005;60(2):87-91. doi:

- 342 10.1159/000084839. Epub 2005 Apr 1.
- 343 25. Yamada T, Matsubara S, Minakami H, Ohkuchi A, Hiratsuka M, Sato I. Relation  
344 between viability of vaginal polymorphonuclear leukocytes and presence of histologic  
345 chorioamnionitis. *Acta Obstet Gynecol Scand.* 2009;79:818e23.
- 346 26. Son M, Miller ES. Predicting preterm birth: Cervical length and fetal fibronectin.  
347 *Semin Perinatol.* 2017; 41(8):445-451. doi:10.1053/j.semperi.2017.08.002. Epub 2017  
348 Sep 19.
- 349 27. Berghella V, Saccone G. Fetal fibronectin testing for reducing the risk of preterm  
350 birth. *Cochrane Database Syst Rev.* 2019; 29:7(7):CD006843.  
351 doi:10.1002/14651858.CD006843.pub3.
- 352 28. Cao H, Hegele RA. Human C-reactive protein (CRP) 1059G/C polymorphism. *J*  
353 *Hum Genet.* 2000;45: 100–101. doi:[10.1007/s100380050022](https://doi.org/10.1007/s100380050022), PubMed: [10721674](https://pubmed.ncbi.nlm.nih.gov/10721674/).
- 354 29. Chen Z, Yu D, Xu ZW, Li SS, Li XF, Li Jing, et al. C-reactive protein gene  
355 polymorphisms and gene-environment interactions in ischaemic stroke. *Neurol Res.*  
356 2015;37(11): 979-984. doi:[10.1179/1743132815Y.0000000053](https://doi.org/10.1179/1743132815Y.0000000053), PubMed: [26004291](https://pubmed.ncbi.nlm.nih.gov/26004291/).
- 357 30. Kuhlenbaeumer G, Hüge A, Berger K, Kessler C, Voelzke H, Funke H, et al..  
358 Genetic variants in the C-reactive protein gene are associated with microangiopathic  
359 ischemic stroke. *Cerebrovasc Dis.* 2010;Volume 30: 476–482.



- 360 doi:[10.1159/000319021](https://doi.org/10.1159/000319021). PubMed: [20733302](https://pubmed.ncbi.nlm.nih.gov/20733302/).
- 361 31. Morita A, Nakayama T, Soma M. Association study between C-reactive protein  
362 genes and ischemic stroke in Japanese subjects. *Am J Hypertens*. 2006;19(6):  
363 593-600. doi:[10.1016/j.amjhyper.2005.11.015](https://doi.org/10.1016/j.amjhyper.2005.11.015), PubMed: [16733231](https://pubmed.ncbi.nlm.nih.gov/16733231/).
- 364 32. Lee CC, You NC, Song Y, Hsu YH, Manson J, Nathan L, et al. Relation of genetic  
365 variation in the gene coding for C-reactive protein with its plasma protein  
366 concentrations: findings from the Women's Health Initiative Observational Cohort.  
367 *Clin Chem*. 2009;55(2): 351-360. doi:[10.1373/clinchem.2008.117176](https://doi.org/10.1373/clinchem.2008.117176), PubMed:  
368 [19095725](https://pubmed.ncbi.nlm.nih.gov/19095725/).
- 369 33. Halder I, Marsland AL, Cheong J, Muldoon MF, Ferrell RE, Manuck SB.  
370 Polymorphisms in the CRP gene moderate an association between depressive  
371 symptoms and circulating levels of C-reactive protein. *Brain Behav Immun*.  
372 2010;24(1): 160-167. doi:[10.1016/j.bbi.2009.09.014](https://doi.org/10.1016/j.bbi.2009.09.014), PubMed: [19796676](https://pubmed.ncbi.nlm.nih.gov/19796676/).
- 373 34. Motoyama S, [Miura M](#), Hinai Y, [Maruyama K](#), Usami S, [Nakatsu T](#), et al.  
374 C-reactive protein 1059G>C genetic polymorphism influences serum C-reactive  
375 protein levels after esophagectomy in patients with thoracic esophageal cancer. *J Am*  
376 *Coll Surg*. 2009;209(4): 477-483. doi:[10.1016/j.jamcollsurg.2009.06.365](https://doi.org/10.1016/j.jamcollsurg.2009.06.365), PubMed:  
377 [19801321](https://pubmed.ncbi.nlm.nih.gov/19801321/).

- 378 35. Romero R, Avila C, Santhanam U, Sehgal PB. Amniotic fluid interleukin 6 in  
379 preterm labor. Association with infection. *J Clin Invest.* 1990;85:1392–400.
- 380 36. Yoon BH, Romero R, Jun JK, et al. Amniotic fluid cytokines (interleukin-6, tumor  
381 necrosis factor-alpha, interleukin-1 beta, and interleukin-8) and the risk for the  
382 development of bronchopulmonary dysplasia. *Am J Obstet Gynecol.* 1997;177:825–  
383 30.
- 384 37. Arntzen KJ, Kjollesdal AM, Halgunset J, et al. TNF, IL-1, IL-6, IL-8 and soluble  
385 TNF receptors in relation to chorioamnionitis and premature labor. *J Perinat Med.*  
386 1998;26:17–26.
- 387 38. Cobo T, Tsiartas P, Kacerovsky M, et al. Maternal inflammatory response to  
388 microbial invasion of the amniotic cavity: analyses of multiple proteins in the  
389 maternal serum. *Acta Obstet Gynecol Scand.* 2013;92:61–8.
- 390 39. Romero R, Sepulveda W, Kenney JS, et al. Interleukin 6 determination in the  
391 detection of microbial invasion of the amniotic cavity. *Ciba Found Symp.*  
392 1992;167:205–20; discussion 220–3.
- 393 40. Romero R, Yoon BH, Kenney JS, et al. Amniotic fluid interleukin-6 determinations  
394 are of diagnostic and prognostic value in preterm labor. *Am J Reprod Immunol.*  
395 1993;30:167–83.

- 396 41. Romero R, Yoon BH, Mazor M, et al. The diagnostic and prognostic value of  
397 amniotic fluid white blood cell count, glucose, interleukin-6, and gram stain in  
398 patients with preterm labor and intact membranes. *Am J Obstet Gynecol.*  
399 1993;169:805–16.
- 400 42. Romero R, Yoon BH, Mazor M, et al. A comparative study of the diagnostic  
401 performance of amniotic fluid glucose, white blood cell count, interleukin-6, and  
402 gram stain in the detection of microbial invasion in patients with preterm premature  
403 rupture of membranes. *Am J Obstet Gynecol.* 1993;169:839–51.
- 404 43. Allbert JR, Naef 3rd RW, Perry Jr. KG, et al. Amniotic fluid interleukin-6 and  
405 interleukin-8 levels predict the success of tocolysis in patients with preterm labor. *J*  
406 *Soc Gynecol Investig.* 1994;1:264–8.
- 407 44. Hsu CD, Meaddough E, Aversa K, et al. Elevated amniotic fluid levels of leukemia  
408 inhibitory factor, interleukin 6, and interleukin 8 in intra-amniotic infection. *Am J*  
409 *Obstet Gynecol.* 1998;179:1267–70.
- 410 45. Yoon BH, Romero R, Kim KS, et al. A systemic fetal inflammatory response and  
411 the development of bronchopulmonary dysplasia. *Am J Obstet Gynecol.*  
412 1999;181:773–9.
- 413 46. Rogers BB, Alexander JM, Head J, et al. Umbilical vein interleukin-6 levels

- 414 correlate with the severity of placental inflammation and gestational age. Hum  
415 Pathol. 2002;33:335–40.
- 416 47. Jacobsson B, Mattsby-Baltzer I, Hagberg H. Interleukin-6 and interleukin-8 in  
417 cervical and amniotic fluid: relationship to microbial invasion of the chorioamniotic  
418 membranes. BJOG. 2005;112:719–24.
- 419 48. Friebe-Hoffmann U, Chiao JP, Rauk PN. Effect of IL-1beta and IL-6 on oxytocin  
420 secretion in human uterine smooth muscle cells. Am J Reprod Immunol. 2001;46:  
421 226–231. doi:[10.1034/j.1600-0897.2001.d01-6.x](https://doi.org/10.1034/j.1600-0897.2001.d01-6.x), PubMed: [11554696](https://pubmed.ncbi.nlm.nih.gov/11554696/).
